# Supplementary material for: RET fusions as primary oncogenic drivers and secondary acquired resistance to EGFR tyrosine kinase inhibitors in patients with non-small-cell lung cancer
Source: Springer Nature journal article supplement (doi:10.1186/s12967-022-03593-3), 2022-09-04

**a**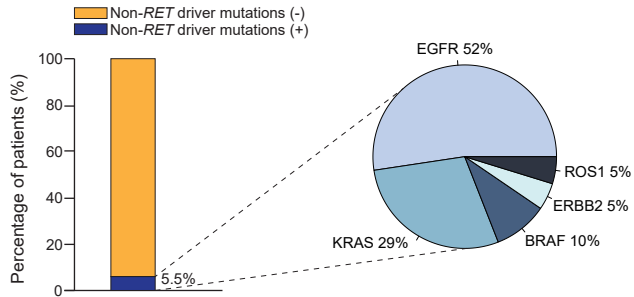**b**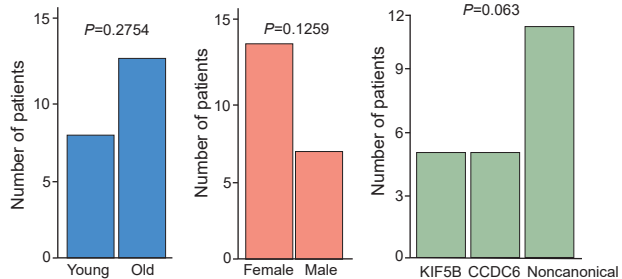

Supplement: MOESM3 [file 23451746]
