# Supplementary material for: RET fusions as primary oncogenic drivers and secondary acquired resistance to EGFR tyrosine kinase inhibitors in patients with non-small-cell lung cancer
Source: Springer Nature journal article supplement (doi:10.1186/s12967-022-03593-3), 2022-09-04

**a**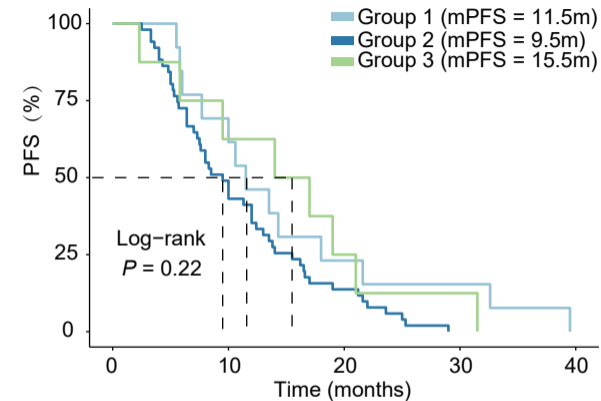

Number at risk

|         |    |    |   |   |   |
|---------|----|----|---|---|---|
| Group 1 | 13 | 9  | 3 | 2 | 0 |
| Group 2 | 51 | 25 | 7 | 0 | 0 |
| Group 3 | 7  | 5  | 2 | 1 | 0 |

**b**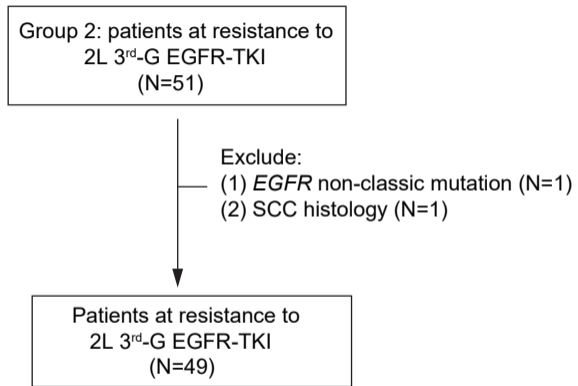

Supplement: MOESM5 [file 23451746]
